# Supplementary material
Source: HighWire-hosted journal article supplement (https://jnm.snmjournals.org/highwire/filestream/95113/field_highwire_adjunct_files/0/183202_Supplemental_Data.pdf)
Supplement: 183202_Supplemental_Data.pdf [file 183202_Supplemental_Data.pdf]

Supplemental Figure 1 Plasma to whole-blood ratio of HAB ( $N=2 \times 3$ ) and MAB ( $N=2 \times 5$ ) with immediate centrifugation

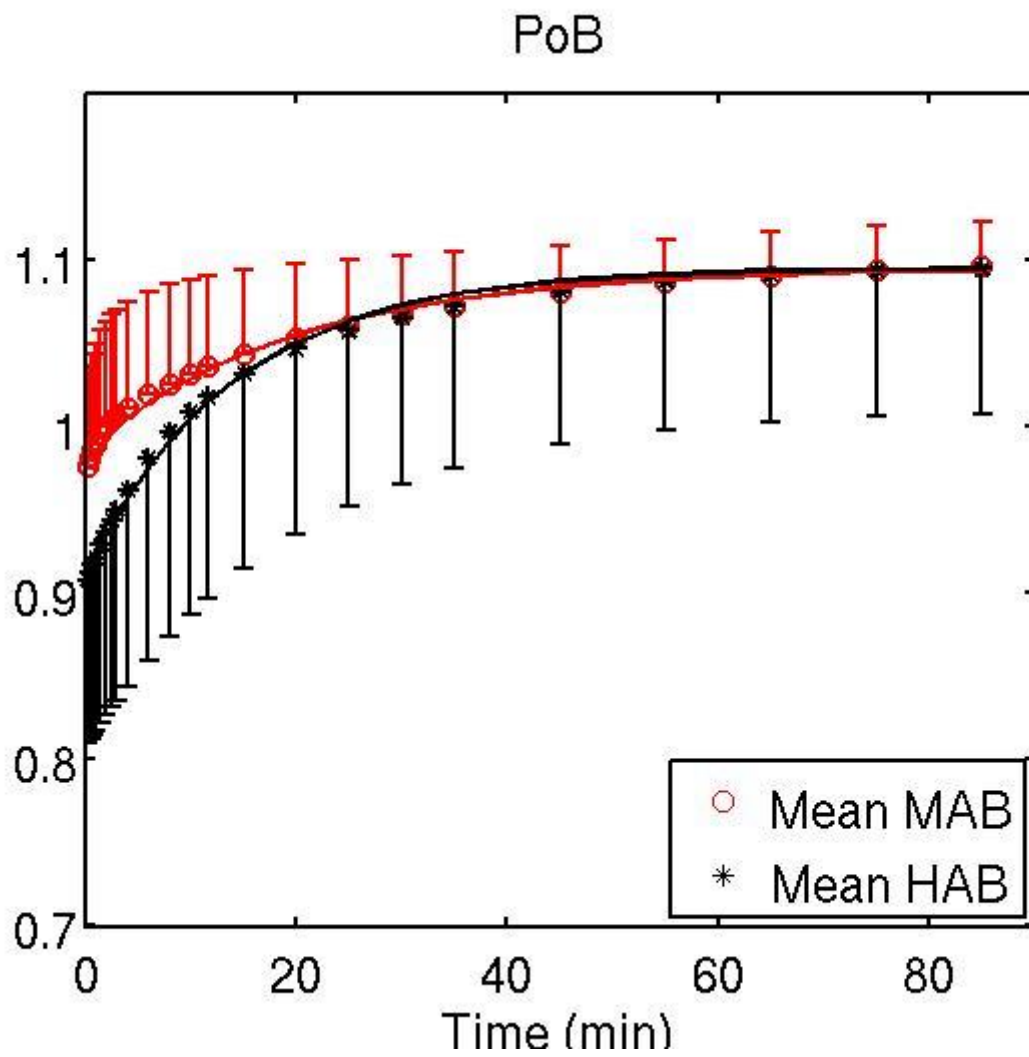

Supplemental Figure 2 Test-retest absolute percentage difference of radioligand concentration in plasma and metabolite-corrected plasma input function before applying the population-adjusted method: Plasma  $C_p$  and Plasma input function  $C_{mcp}$ ; and after: Population-based  $C_p$  (PB- $C_p$ ) and PB- $C_{mcp}$

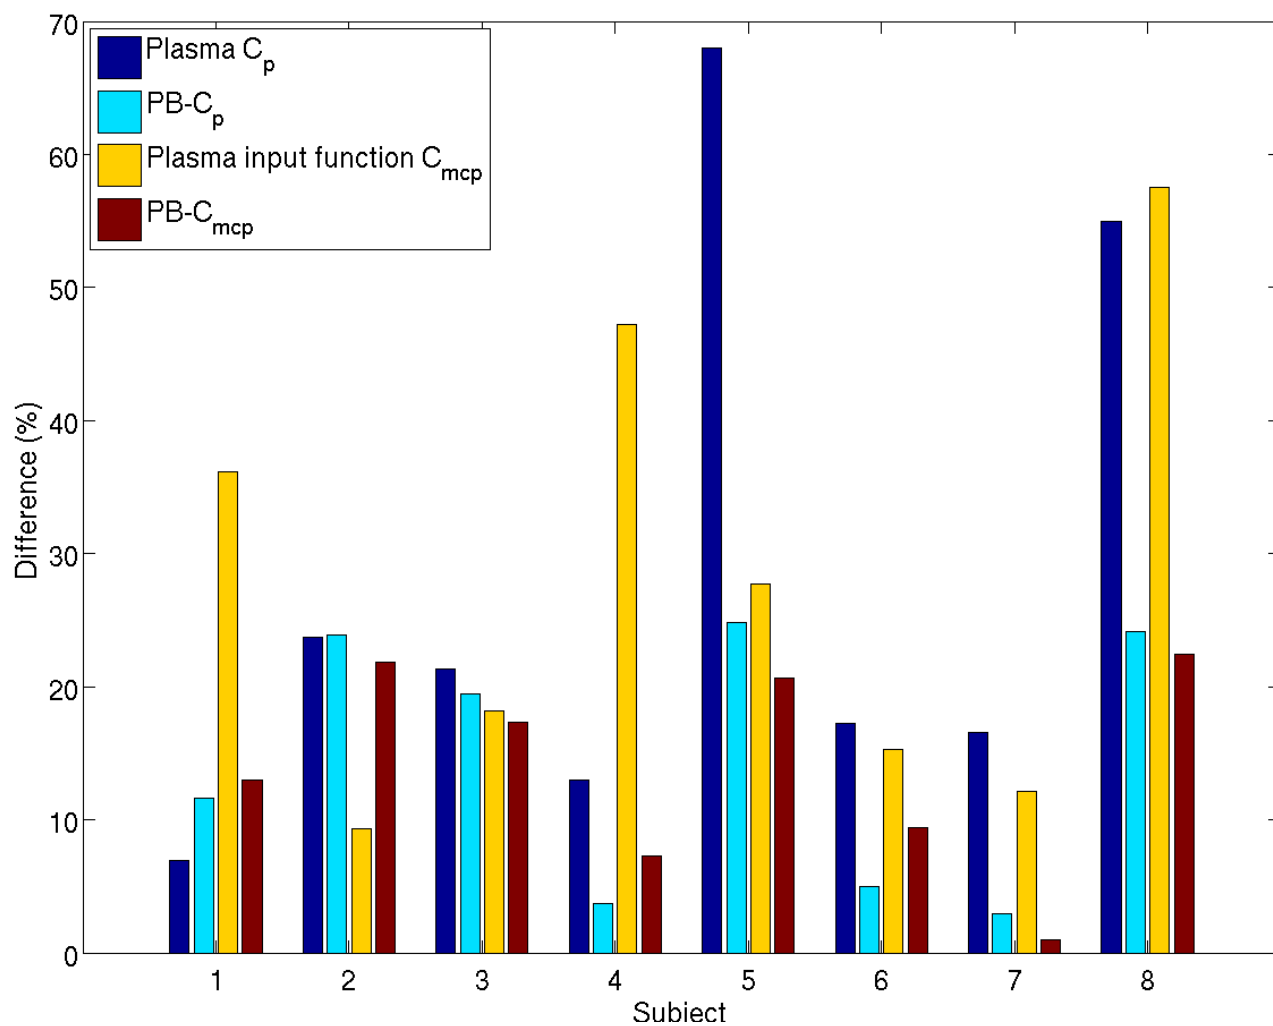

Supplemental Table 1 Regional distribution volume  $V_T$  (mL/cm<sup>3</sup>) from 2TCM of the immediate centrifuged scans for high affinity binders (HAB) and mixed affinity binders (MAB)

| ID              | HAB  |        | HAB  |        | HAB  |        | MAB  |        |
|-----------------|------|--------|------|--------|------|--------|------|--------|------|--------|------|--------|------|--------|------|--------|
|                 | Test | Retest |
| Regions         | 11   | 11     | 15   | 15     | 16   | 16     | 9    | 9      | 10   | 10     | 12   | 12     | 13   | 13     | 14   | 14     |
| Midbrain        | 7.5  | 9.1    | 7.1  | 6.5    | 10.2 | 13.4   | 6.3  | 5.2    | 5.1  | 5.1    | 6.1  | 5.3    | 5.0  | 5.0    | 4.1  | 4.3    |
| Thalamus        | 8.3  | 9.5    | 7.4  | 7.3    | 8.2  | 11.7   | 3.1  | 4.2    | 3.5  | 3.5    | 4.4  | 4.7    | 4.6  | 4.9    | 5.0  | 5.5    |
| Pons            | 8.5  | 6.4    | 8.8  | 8.1    | 8.2  | 12.0   | 3.3  | 4.1    | 5.3  | 5.8    | 4.7  | 4.4    | 4.5  | 6.8    | 4.6  | 4.6    |
| Pallidostriatum | 6.5  | 8.9    | 7.3  | 7.3    | 8.8  | 8.0    | 3.2  | 3.4    | 3.5  | 2.9    | 3.5  | 3.6    | 3.9  | 5.6    | 3.8  | 4.1    |
| Hippocampus     | 5.6  | 7.4    | 6.0  | 5.8    | 7.1  | 7.5    | 3.1  | 3.1    | 2.9  | 3.5    | 3.7  | 4.0    | 6.2  | 5.7    | 4.1  | 4.4    |
| Cerebellum      | 5.4  | 6.3    | 6.3  | 6.3    | 6.5  | 7.0    | 2.4  | 3.1    | 3.2  | 3.0    | 3.5  | 3.3    | 3.5  | 3.8    | 3.7  | 3.8    |
| Neocortex       | 5.0  | 6.0    | 6.4  | 6.1    | 6.1  | 7.2    | 2.3  | 2.7    | 3.5  | 3.1    | 3.3  | 3.3    | 4.5  | 4.1    | 3.9  | 4.0    |

Supplemental Table 2 Regional distribution volume  $V_T$  (mL/cm<sup>3</sup>) from 2TCM of the delayed centrifuged scans without population-based adjustment of the metabolite-corrected input function, but with parent fraction adjustment for high affinity binders (HAB) and mixed affinity binders (MAB)

| ID<br>Regions   | MAB  |        | MAB  |        | MAB  |        | HAB  |        |
|-----------------|------|--------|------|--------|------|--------|------|--------|------|--------|------|--------|------|--------|------|--------|
|                 | Test | Retest |
|                 | 1    | 1      | 2    | 2      | 6    | 6      | 3    | 3      | 4    | 4      | 5    | 5      | 7    | 7      | 8    | 8      |
| Midbrain        | 5.0  | 5.8    | 4.7  | 4.4    | 10.2 | 10.5   | 7.5  | 12.3   | 8.7  | 7.3    | 12.9 | 9.5    | 7.1  | 6.2    | 7.5  | 5.7    |
| Thalamus        | 5.6  | 6.7    | 4.4  | 3.9    | 9.6  | 10.6   | 7.6  | 11.2   | 8.3  | 6.5    | 12.8 | 7.4    | 5.1  | 4.7    | 9.0  | 5.5    |
| Pons            | 4.4  | 4.7    | 4.4  | 4.5    | 9.3  | 10.8   | 6.4  | 12.5   | 9.0  | 10.4   | 11.4 | 11.2   | 7.1  | 5.3    | 8.1  | 6.8    |
| Pallidostriatum | 3.5  | 4.6    | 4.3  | 3.9    | 7.5  | 8.6    | 6.1  | 11.6   | 7.3  | 5.2    | 9.4  | 8.2    | 4.8  | 4.1    | 5.3  | 4.9    |
| Hippocampus     | 4.5  | 4.7    | 3.1  | 3.5    | 8.2  | 7.5    | 6.0  | 9.9    | 7.3  | 8.6    | 8.9  | 7.0    | 4.5  | 4.8    | 7.4  | 4.4    |
| Cerebellum      | 3.6  | 3.8    | 2.9  | 2.9    | 6.7  | 7.1    | 5.7  | 9.5    | 6.9  | 5.0    | 8.3  | 6.0    | 4.7  | 4.0    | 5.3  | 3.9    |
| Neocortex       | 3.3  | 3.8    | 3.0  | 2.7    | 6.5  | 7.1    | 5.0  | 8.0    | 6.5  | 4.6    | 8.1  | 5.8    | 4.6  | 4.0    | 5.4  | 3.6    |

Supplemental Table 3 Regional distribution volume  $V_T$  (mL/cm<sup>3</sup>) from 2TCM of the delayed centrifuged scans with population-based adjustment of the metabolite-corrected input function for high affinity binders (HAB) and mixed affinity binders (MAB)

| ID              | MAB  |        | MAB  |        | MAB  |        | HAB  |        |
|-----------------|------|--------|------|--------|------|--------|------|--------|------|--------|------|--------|------|--------|------|--------|
|                 | Test | Retest |
| Regions         | 1    | 1      | 2    | 2      | 6    | 6      | 3    | 3      | 4    | 4      | 5    | 5      | 7    | 7      | 8    | 8      |
| Midbrain        | 4.7  | 5.4    | 5.4  | 4.9    | 6.9  | 5.4    | 15.4 | 17.6   | 7.8  | 8.8    | 11.1 | 10.7   | 5.7  | 4.8    | 6.3  | 5.8    |
| Thalamus        | 4.5  | 4.7    | 5.1  | 4.6    | 6.6  | 5.3    | 9.5  | 8.7    | 7.7  | 6.0    | 13.9 | 12.5   | 4.1  | 4.2    | 7.2  | 6.0    |
| Pons            | 3.7  | 3.2    | 5.0  | 5.1    | 5.8  | 5.4    | 8.8  | 12.2   | 7.8  | 7.6    | 11.2 | 12.4   | 5.8  | 5.6    | 7.4  | 7.6    |
| Pallidostriatum | 5.0  | 3.1    | 4.4  | 4.4    | 4.9  | 4.4    | 7.4  | 9.4    | 6.8  | 5.5    | 8.6  | 10.0   | 3.9  | 3.3    | 4.6  | 5.1    |
| Hippocampus     | 5.0  | 3.2    | 4.2  | 4.4    | 5.1  | 3.6    | 7.4  | 7.1    | 5.8  | 5.6    | 7.3  | 6.8    | 4.4  | 4.2    | 5.3  | 4.2    |
| Cerebellum      | 2.9  | 2.6    | 3.2  | 3.1    | 4.4  | 3.8    | 7.2  | 7.4    | 6.2  | 4.7    | 7.1  | 7.0    | 3.7  | 3.4    | 4.7  | 4.2    |
| Neocortex       | 2.3  | 2.6    | 3.2  | 3.1    | 4.2  | 3.7    | 6.1  | 6.4    | 5.8  | 4.2    | 7.1  | 6.6    | 3.8  | 3.4    | 4.5  | 4.4    |
